# Supplementary material for: Copper(i)oxide microparticles – synthesis and antimicrobial finishing of textiles
Source: Royal Society of Chemistry journal article supplement (doi:10.1039/c5tb01049g), 2015-01-01
Supplement: c5tb01049g1.pdf [file c5tb01049g1.pdf]

## Supplementary Material

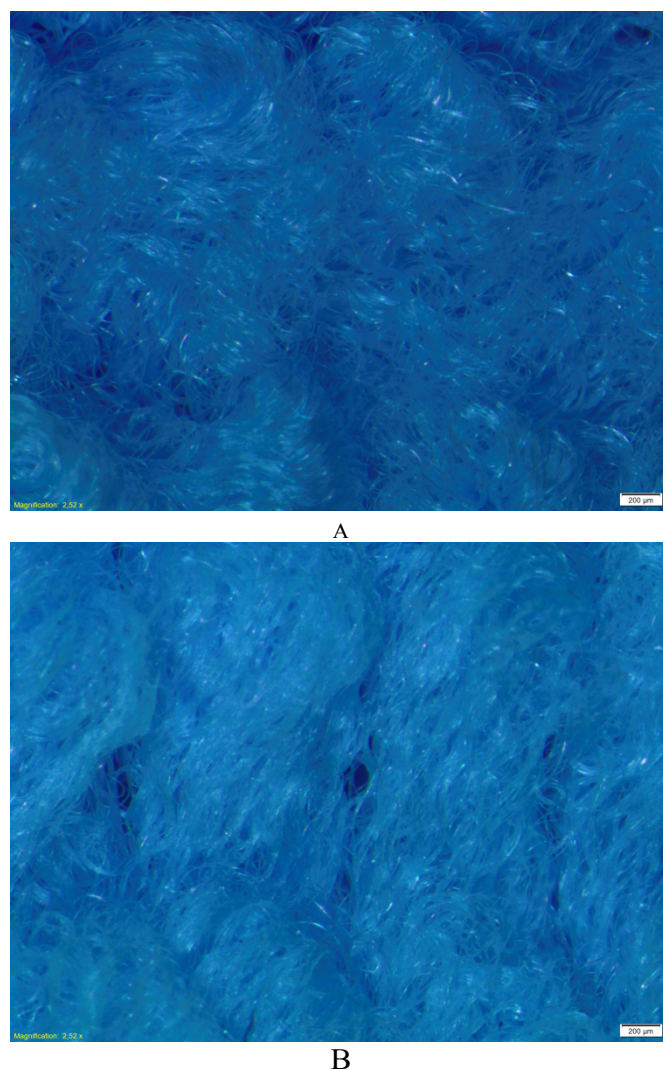

Fig.S1 Microphotographs of untreated (A) and Cu<sub>2</sub>O/binder treated (B) samples

In Figure S1a and S1b microscope photos of blank sample A and Cu<sub>2</sub>O/binder treated respectively are shown. The fibres in Figure S1b appear more compact as a result of the padding and fixation process. The amounts of binder used for Cu<sub>2</sub>O fixation however are too low to form a visible coating layer. In a magnified photograph of Cu<sub>2</sub>O/binder treated sample A the Cu<sub>2</sub>O particles can be recognised, while no visible binder layer is present (Figure S2).

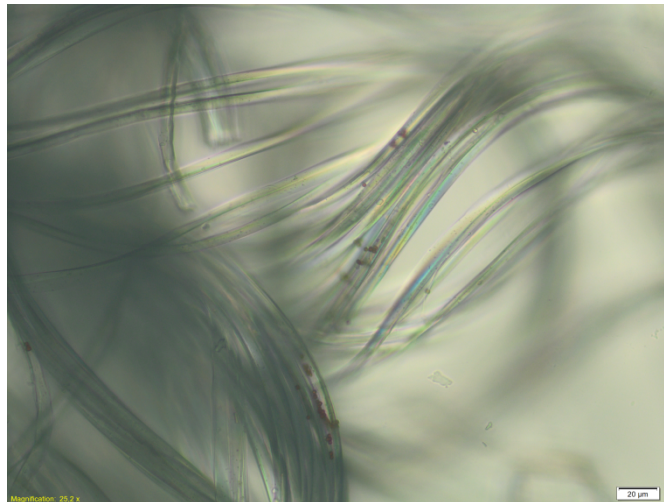

Fig. S2 Microscope photograph of Cu<sub>2</sub>O/binder treated sample A

---

Figures S3 and S4 show electron micrographs of untreated and Cu<sub>2</sub>O/binder treated samples A and B. The small Cu<sub>2</sub>O particles can be recognised as light dots on the fibres.

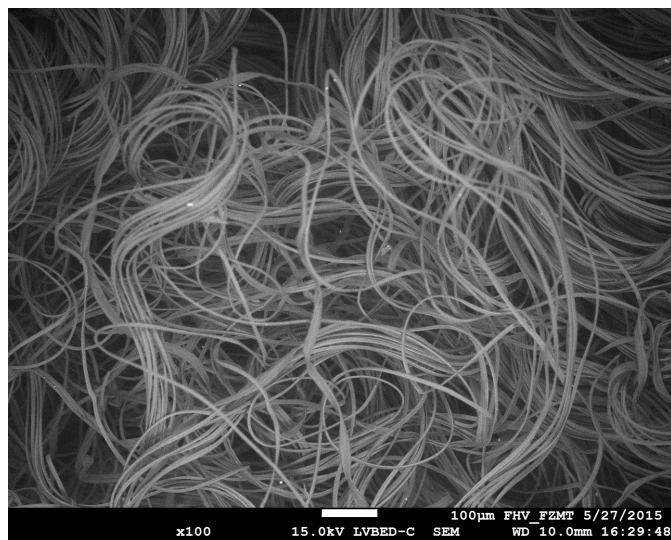

A

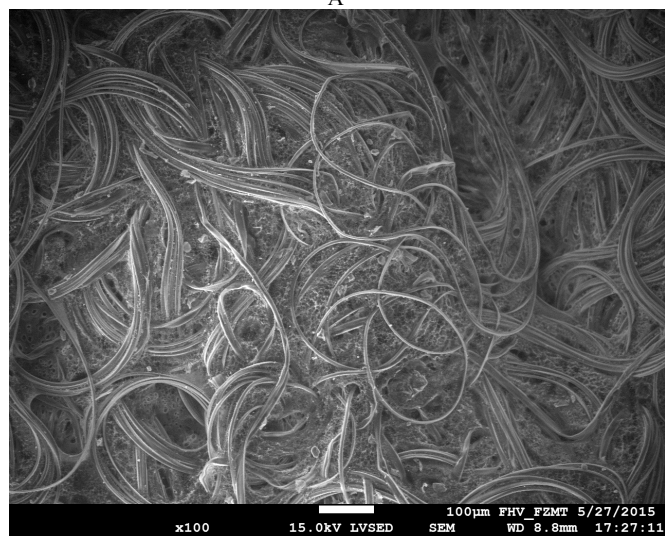

B

Fig. S3 Electron micrographs of untreated (A) and Cu<sub>2</sub>O/binder treated (B) sample A

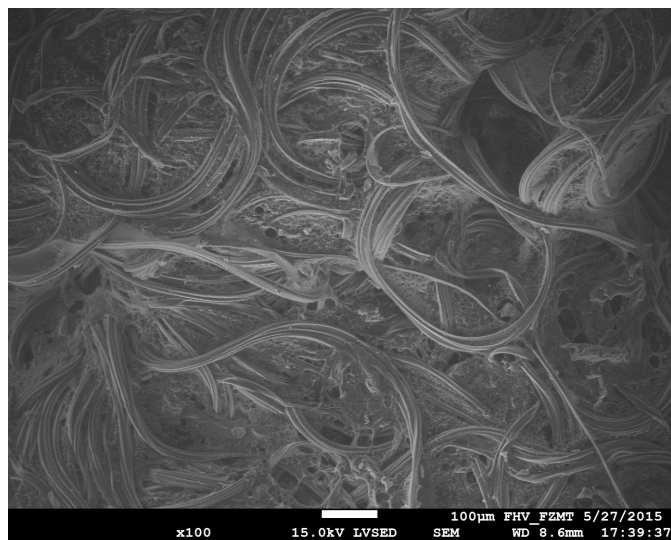

A

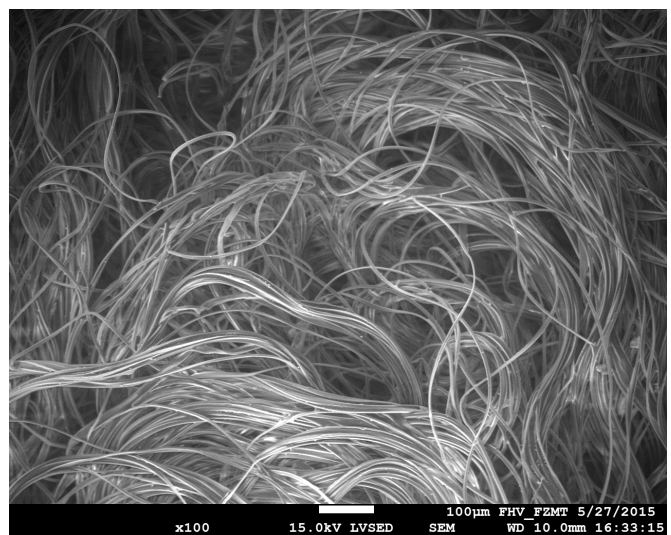

B

Fig.S4 Electron micrographs of untreated (A) and Cu<sub>2</sub>O/binder treated (B) sample B
